# Supplementary material
Source: PubMed Central journal article supplement (PMC6109937)
Supplement: supp_RA118.003910_138059_1_supp_158584_pkw9kz.pdf [file supp_RA118.003910_138059_1_supp_158584_pkw9kz.pdf]

## **Supporting information**

Routes of phosphoryl-group transfer during signal transmission and signal decay in the dimeric sensor  
histidine kinase ArcB

Juan Luis Teran-Melo, Gabriela R. Peña-Sandoval, Hortencia Silva-Jimenez, Claudia Rordiguez, Adrián  
F. Alvarez and Dimitris Georgellis

**Figures S1, S2 and S3, Table S1 and references**

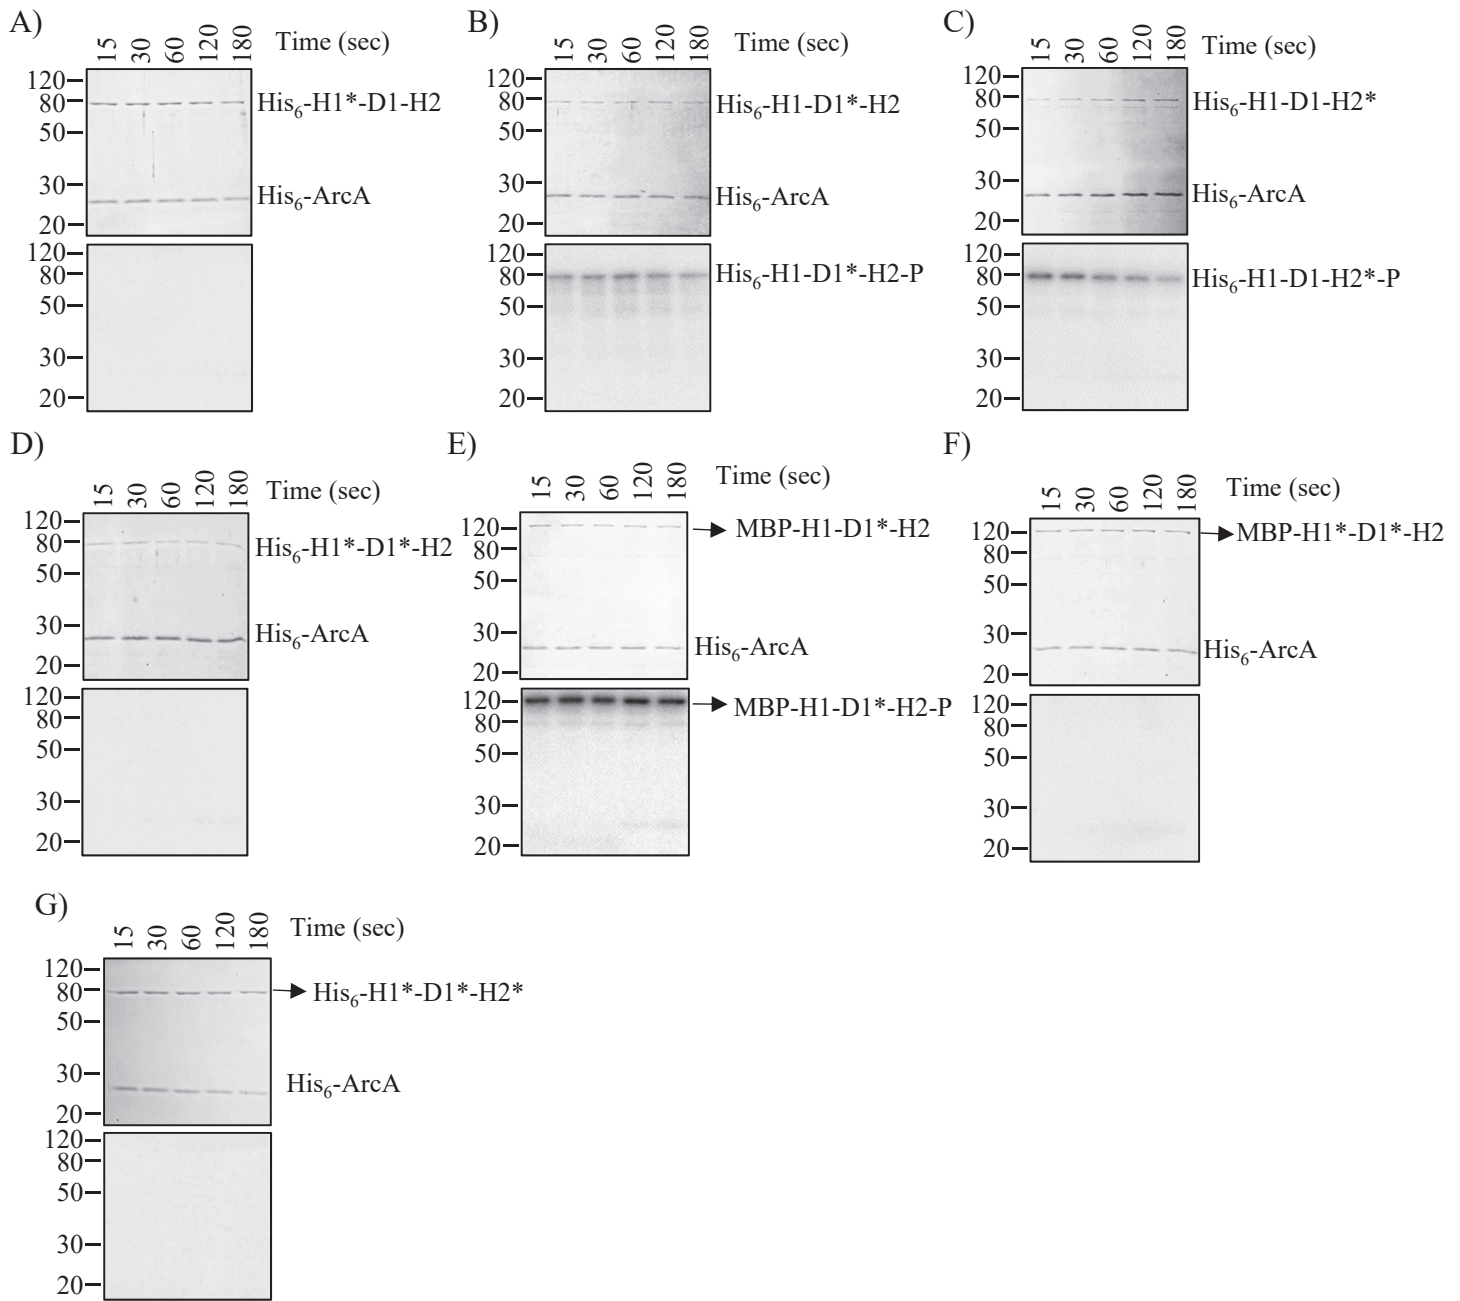

Figure S1. None of the His<sub>6</sub>-ArcB<sup>78-778</sup> and MBP-ArcB<sup>78-778</sup> mutants are able to transphosphorylate ArcA. Purified ArcA was incubated in a 30  $\mu$ l-reaction mixture, in the presence of [ $\gamma$ -<sup>32</sup>P]ATP, with (A) His<sub>6</sub>-H1\*-D1-H2, (B) His<sub>6</sub>-H1-D1\*-H2, (C) His<sub>6</sub>-H1-D1-H2\*, (D) His<sub>6</sub>-H1-D1\*-H2\*, (E) MBP-H1-D1\*-H2, (F) MBP-H1\*-D1\*-H2, or (G) His<sub>6</sub>-H1\*-D1\*-H2\*, and 5- $\mu$ l samples were withdrawn at the indicated time intervals for SDS-PAGE analysis. The Coomassie blue-stained gels revealing protein bands (upper panels), and the corresponding autoradiograms (bottom panels) are presented. The molecular mass standard values (kDa) are shown on the left, and the position of each polypeptide in the gel is indicated on the right side of each panel.

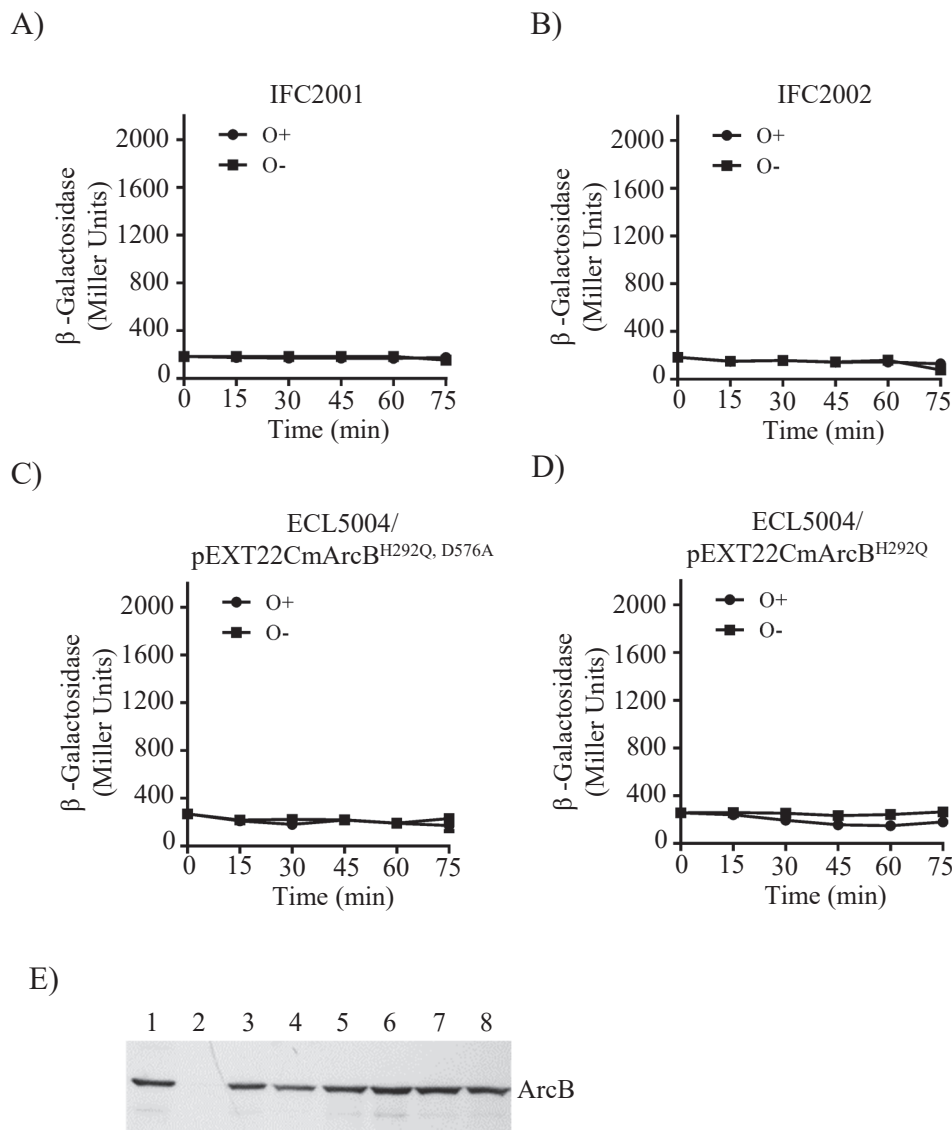

Figure S2. Mutant variants of ArcB do not activate the anaerobic expression of the *cydA'*-*lacZ* reporter. Cultures of strain (A) IFC2001 (*arcB*<sup>D576A</sup>), (B) IFC5002 (*arcB*<sup>H717Q</sup>), (C) ECL5004 (*arcB*<sup>-</sup>) harboring plasmid pEXT22CmArcB<sup>H292Q, D576A</sup>, and (D) ECL5004 (*arcB*<sup>-</sup>) harboring plasmid pEXT22CmArcB<sup>H292Q</sup>, all carrying the ArcA-P activatable  $\lambda\Phi$ (*cydA'*-*lacZ*) reporter, were grown aerobically in LB buffered with 0.1M MOPS (pH 7.4) and supplemented with 20 mM D-xylose. At an OD<sub>600</sub> of 0.2, one aliquot was withdrawn, to measure the  $\beta$ -galactosidase activity (depicted as 0 min), and the rest of the culture was divided to two parts. One part was kept under aerobic conditions (circles), as a control, whereas the other was shifted to anaerobiosis (squares), and the time course of the  $\beta$ -galactosidase activity was followed. Data represent the averages from three independent experiments and the standard deviation values are indicated. (E) Equal number of bacteria of the above aerobic cultures and those used for Figure 3 were analyzed by Western blot analysis, using ArcB polyclonal antibodies. Lanes correspond to (1) ECL5003, (2) ECL5004, (3) IFC2001, (4) IFC2002, (5) IFC2001 carrying pEXT22CmArcB<sup>H292Q</sup>, (6) IFC2002 carrying pEXT22CmArcB<sup>H292Q, D576A</sup>, (7) ECL5004 carrying pEXT22CmArcB<sup>H292Q</sup>, and (8) ECL5004 carrying pEXT22CmArcB<sup>H292Q, D576A</sup>.

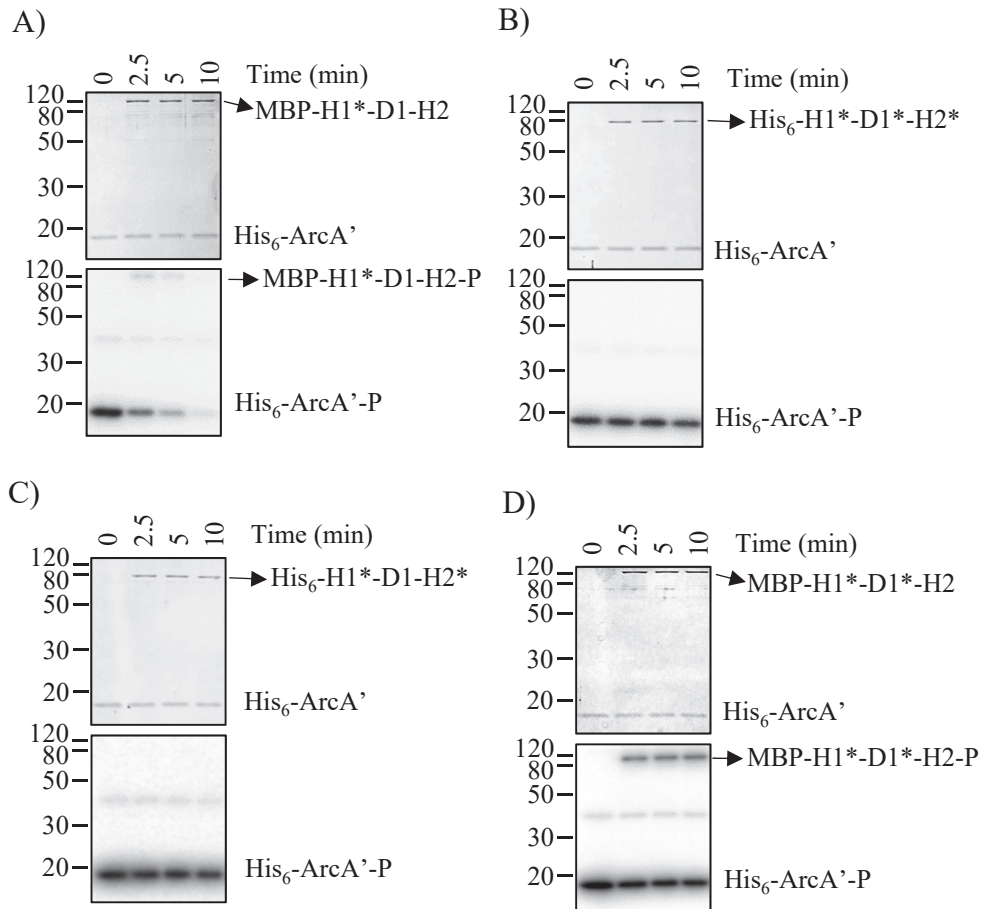

Figure S3. ArcA'-P dephosphorylation by His<sub>6</sub>-ArcB<sup>78-778</sup> and MBP-ArcB<sup>78-778</sup> mutant variants. Purified ArcA'-P was incubated with (A) MBP-H1\*-D1-H2, (B) His<sub>6</sub>-H1\*-D1\*-H2\*, (C) His<sub>6</sub>-H1\*-D1-H2\*, or (D) MBP-H1\*-D1\*-H2, in 25  $\mu$ l-reaction mixtures. At the indicated time points, 5- $\mu$ l samples were withdrawn for SDS-PAGE analysis. The Coomassie blue-stained gels revealing protein bands (upper panels), and the corresponding autoradiograms (bottom panels) are presented. The molecular mass standard values (kDa) are shown on the left, and the position of each polypeptide in the gel is indicated on the right side of each panel.

Table S1. *E. coli* strain and plasmids used in this work

| Strain                                    | Relevant characteristics                                                                                                                      | Source     |
|-------------------------------------------|-----------------------------------------------------------------------------------------------------------------------------------------------|------------|
| MC4100                                    | <i>F<sup>-</sup> araD139 (argF-lac) U169 rpsL150 relA1 flbB5301 deoC ptsF25 rbsR</i>                                                          | (1)        |
| ECL5002                                   | MC4100 $\lambda\Phi$ ( <i>lldP'</i> - <i>lacZ</i> )                                                                                           | (2)        |
| ECL5003                                   | MC4100 $\Delta$ <i>fnr</i> ::Tn9(Cm <sup>r</sup> ) $\lambda\Phi$ ( <i>cydA'</i> - <i>lacZ</i> )                                               | (2)        |
| ECL5004                                   | MC4100 $\Delta$ <i>arcB</i> ::Tet <sup>r</sup> $\Delta$ <i>fnr</i> ::Tn9(Cm <sup>r</sup> ) $\lambda\Phi$ ( <i>cydA'</i> - <i>lacZ</i> )       | (2)        |
| ECL5012                                   | MC4100 $\Delta$ <i>arcB</i> ::Tet <sup>r</sup> $\lambda\Phi$ ( <i>lldP'</i> - <i>lacZ</i> )                                                   | (2)        |
| ECL5023                                   | MC4100 <i>arcB</i> <sup>D576A</sup> Kan <sup>r</sup> $\lambda\Phi$ ( <i>cydA'</i> - <i>lacZ</i> ) $\Delta$ <i>fnr</i> ::Tn9(Cm <sup>r</sup> ) | (3)        |
| ECL5024                                   | MC4100 <i>arcB</i> <sup>H717Q</sup> Kan <sup>r</sup> $\lambda\Phi$ ( <i>cydA'</i> - <i>lacZ</i> ) $\Delta$ <i>fnr</i> ::Tn9(Cm <sup>r</sup> ) | (3)        |
| ECL5032                                   | MC4100 <i>arcB</i> <sup>H717Q</sup> Kan <sup>r</sup> $\lambda\Phi$ ( <i>lldP'</i> - <i>lacZ</i> )                                             | (3)        |
| IFC2001                                   | MC4100 <i>arcB</i> <sup>D576A</sup> Kan <sup>r</sup> $\lambda\Phi$ ( <i>cydA'</i> - <i>lacZ</i> ) $\Delta$ <i>fnr</i> ::Tet <sup>r</sup>      | This study |
| IFC2002                                   | MC4100 <i>arcB</i> <sup>H717Q</sup> Kan <sup>r</sup> $\lambda\Phi$ ( <i>cydA'</i> - <i>lacZ</i> ) $\Delta$ <i>fnr</i> ::Tet <sup>r</sup>      | This study |
| <b>Plasmid</b>                            |                                                                                                                                               |            |
| pEXT22                                    | Low copy number vector, Kan <sup>r</sup>                                                                                                      | (4)        |
| pEXT22Cm                                  | Low copy number vector, Kan <sup>r</sup> , Cm <sup>r</sup>                                                                                    | This study |
| pACT3                                     | Low copy number vector, Cm <sup>r</sup>                                                                                                       | (4)        |
| pMX712                                    | <i>arcB</i> under native promoter in pBluescript KS II (+), Amp <sup>r</sup>                                                                  | (5)        |
| pMX517                                    | <i>arcB</i> in pBAD30 under control of l-arabinose inducible promoter, Amp <sup>r</sup>                                                       | (5)        |
| pQE30ArcB <sup>78-778</sup>               | His <sub>6</sub> -ArcB <sup>78-778</sup> in pQE30 under IPTG inducible promoter, Amp <sup>r</sup>                                             | (6)        |
| pMX028                                    | His <sub>6</sub> -ArcB <sup>78-778, H292Q</sup> in pQE30 under IPTG inducible promoter, Amp <sup>r</sup>                                      | (7)        |
| pQE30ArcB <sup>78-778, D576A, H717Q</sup> | His <sub>6</sub> -ArcB <sup>78-778, D576A, H717Q</sup> in pQE30 under IPTG inducible promoter, Amp <sup>r</sup>                               | (8)        |
| pQE30ArcB <sup>78-661, D576A</sup>        | His <sub>6</sub> -ArcB <sup>78-661, D576A</sup> in pQE30 under IPTG inducible promoter, Amp <sup>r</sup>                                      | (8)        |
| pQE30ArcB <sup>521-778, H717Q</sup>       | His <sub>6</sub> -ArcB <sup>521-778, H717Q</sup> in pQE30 under IPTG inducible promoter, Amp <sup>r</sup>                                     | (9)        |
| pQE30ArcA                                 | His <sub>6</sub> -ArcA in pQE30 under IPTG inducible promoter, Amp <sup>r</sup>                                                               | (10)       |
| pQE30ArcA <sup>1-136</sup>                | His <sub>6</sub> -ArcA <sup>1-136</sup> (His <sub>6</sub> ArcA') in pQE30 under IPTG inducible promoter, Amp <sup>r</sup>                     | (9)        |
| pQE30ArcB <sup>78-778, D576A</sup>        | His <sub>6</sub> -ArcB <sup>78-778, D576A</sup> in pQE30 under IPTG inducible promoter, Amp <sup>r</sup>                                      | This study |
| pQE30ArcB <sup>78-778, H717Q</sup>        | His <sub>6</sub> -ArcB <sup>78-778, H717Q</sup> in pQE30 under IPTG inducible promoter, Amp <sup>r</sup>                                      | This study |
| pQE30ArcB <sup>78-778, H292Q, H717Q</sup> | His <sub>6</sub> -ArcB <sup>78-778, H292Q, H717Q</sup> in pQE30 under IPTG inducible promoter, Amp <sup>r</sup>                               | This study |

|                                                     |                                                                                                                                |            |
|-----------------------------------------------------|--------------------------------------------------------------------------------------------------------------------------------|------------|
| pQE30ArcB <sup>78-778, H292Q, D576A</sup>           | His <sub>6</sub> -ArcB <sup>78-778, H292Q, D576A</sup> in pQE30 under IPTG inducible promoter, Amp <sup>r</sup>                | This study |
| pQE30ArcB <sup>78-778, H292Q, D576A, H717Q</sup>    | His <sub>6</sub> -ArcB <sup>78-778, H292Q, D576A, H717Q</sup> in pQE30 under IPTG inducible promoter, Amp <sup>r</sup>         | This study |
| pBADHis-ArcB <sup>78-778, H292Q</sup>               | His <sub>6</sub> -ArcB <sup>78-778, H292Q</sup> in pBAD30 under l-arabinose inducible promoter, Amp <sup>r</sup>               | This study |
| pBADHis-ArcB <sup>78-778, H292Q, D576A</sup>        | His <sub>6</sub> -ArcB <sup>78-778, H292Q, D576A</sup> in pBAD30 under l-arabinose inducible promoter, Amp <sup>r</sup>        | This study |
| pBADHis-ArcB <sup>78-778, H292Q, D576A, H717Q</sup> | His <sub>6</sub> -ArcB <sup>78-778, H292Q, D576A, H717Q</sup> in pBAD30 under l-arabinose inducible promoter, Amp <sup>r</sup> | This study |
| pBADHis-ArcB <sup>78-778, H717Q</sup>               | His <sub>6</sub> -ArcB <sup>78-778, H717Q</sup> in pBAD30 under l-arabinose inducible promoter, Amp <sup>r</sup>               | This study |
| pBADHis-ArcB <sup>78-778, H292Q, H717Q</sup>        | His <sub>6</sub> -ArcB <sup>78-778, H292Q, H717Q</sup> in pBAD30 under l-arabinose inducible promoter, Amp <sup>r</sup>        | This study |
| pMAL-ArcB <sup>78-778</sup>                         | MBP-ArcB <sup>78-778</sup> in pMALc2x under IPTG inducible promoter, Amp <sup>r</sup>                                          | This study |
| pACT3MBP-ArcB <sup>78-778</sup>                     | MBP-ArcB <sup>78-778</sup> in pACT3 under IPTG inducible promoter, Cm <sup>r</sup>                                             | This study |
| pACT3MBP-ArcB <sup>78-778, H292Q</sup>              | MBP-ArcB <sup>78-778, H292Q</sup> in pACT3 under IPTG inducible promoter, Cm <sup>r</sup>                                      | This study |
| pACT3MBP-ArcB <sup>78-778, D576A</sup>              | MBP-ArcB <sup>78-778, D576A</sup> in pACT3 under IPTG inducible promoter, Cm <sup>r</sup>                                      | This study |
| pACT3MBP-ArcB <sup>78-778, H292Q, D576A</sup>       | MBP-ArcB <sup>78-778, H292Q, D576A</sup> in pACT3 under IPTG inducible promoter, Cm <sup>r</sup>                               | This study |
| pMX546                                              | <i>arcB</i> <sup>H292Q</sup> under native promoter in pBluescript KS II (+), Amp <sup>r</sup>                                  | This study |
| pMX547                                              | <i>arcB</i> <sup>H292Q, D576A</sup> under native promoter in pBluescript KS II (+), Amp <sup>r</sup>                           | This study |
| pMX548                                              | <i>arcB</i> <sup>D576A, H717Q</sup> under native promoter in pBluescript KS II (+), Amp <sup>r</sup>                           | This study |
| pEXT22CmArcB <sup>wt</sup>                          | <i>arcB</i> under native promoter in pEXT22Cm, Kan <sup>r</sup> , Cm <sup>r</sup>                                              | This study |
| pEXT22CmArcB <sup>H292Q</sup>                       | <i>arcB</i> <sup>H292Q</sup> under native promoter in pEXT22Cm, Kan <sup>r</sup> , Cm <sup>r</sup>                             | This study |
| pEXT22CmArcB <sup>H292Q, D576A</sup>                | <i>arcB</i> <sup>H292Q, D576A</sup> under native promoter in pEXT22Cm, Kan <sup>r</sup> , Cm <sup>r</sup>                      | This study |
| pBADArcB <sup>H292Q, D576A</sup>                    | <i>arcB</i> <sup>H292Q, D576A</sup> in pBAD30 under l-arabinose inducible promoter, Amp <sup>r</sup>                           | This study |
| pBADArcB <sup>D576D, H717A</sup>                    | <i>arcB</i> <sup>D576A, H717Q</sup> in pBAD30 under l-arabinose inducible promoter, Amp <sup>r</sup>                           | This study |

## References

1. Casadaban, M. J. (1976) Transposition and fusion of the *lac* genes to selected promoters in *Escherichia coli* using bacteriophage Lambda and Mu. *J. Mol. Biol.* **104**, 541–555
2. Kwon, O., Georgellis, D., Lynch, A. S., Boyd, D., and Lin, E. C. (2000) The ArcB sensor kinase of *Escherichia coli*: genetic exploration of the transmembrane region. *J. Bacteriol.* **182**, 2960–2966
3. Kwon, O., Georgellis, D., and Lin, E. C. (2000) Phosphorelay as the sole physiological route of signal transmission by the Arc two-component system of *Escherichia coli*. *J. Bacteriol.* **182**, 3858–3862
4. Dykxhoorn, D. M., St Pierre, R., and Linn, T. (1996) A set of compatible tac promoter expression vectors. *Gene.* **177**, 133–136
5. Nuñez Oreza, L. A., Alvarez, A. F., Arias-Olguín, I. I., Torres Larios, A., and Georgellis, D. (2012) The ArcB leucine zipper domain is required for proper ArcB signaling. *PLoS One.* **7**, e38187
6. Georgellis, D., Lynch, A. S., and Lin, E. C. (1997) *In vitro* phosphorylation study of the Arc two-component signal transduction system of *Escherichia coli*. *J. Bacteriol.* **179**, 5429–5435
7. Peña-Sandoval, G. R., and Georgellis, D. (2010) The ArcB sensor kinase of *Escherichia coli* autophosphorylates by an intramolecular reaction. *J. Bacteriol.* **192**, 1735–1739
8. Georgellis, D., Kwon, O., and Lin, E. C. (1999) Amplification of signaling activity of the Arc two-component system of *Escherichia coli* by anaerobic metabolites. An *in vitro* study with different protein modules. *J. Biol. Chem.* **274**, 35950–35954
9. Georgellis, D., Kwon, O., De Wulf, P., and Lin, E. C. (1998) Signal decay through a reverse phosphorelay in the Arc two-component signal transduction system. *J. Biol. Chem.* **273**, 32864–32869
10. Lynch, A. S., and Lin, E. C. (1996) Transcriptional control mediated by the ArcA two-component response regulator protein of *Escherichia coli*: characterization of DNA binding at target promoters. *J. Bacteriol.* **178**, 6238–6249
